# Supplementary material
Source: Springer Nature journal article supplement (https://www.springermedizin.de/resource/supplementary/12885_2013_4033_MOESM1_ESM.pdf/9465066)
Supplement: MOESM1 [file 9465066]

| Subject_ID | Diagnosis | Gender | Age | Location     | Stage   | Grading | PolypSize | Type           |
|------------|-----------|--------|-----|--------------|---------|---------|-----------|----------------|
| BSM 0451   | Healthy   | F      | 32  | NA           | NA      | NA      | NA        | NA             |
| BSM 0452   | Healthy   | F      | 72  | NA           | NA      | NA      | NA        | NA             |
| BSM 0453   | Healthy   | M      | 67  | NA           | NA      | NA      | NA        | NA             |
| BSM 0454   | Tumor     | M      | 71  | sigmoid      | pT2 pN0 | G2      | NA        | adenocarcinoma |
| BSM 0455   | Tumor     | M      | 72  | rectosigmoid | pT2 pN1 | G2      | NA        | adenocarcinoma |
| BSM 0456   | Tumor     | F      | 53  | cecum        | pT3 pN0 | G2      | NA        | adenocarcinoma |
| BSM 0457   | Adenoma   | F      | 75  | sigmoid      | pT2 pN0 | G2      | 12 mm     | tubulovillous  |
| BSM 0458   | Adenoma   | F      | 62  | sigmoid      | pT3 pN1 | G3      | 7 mm      | tubular        |
| BSM 0459   | Adenoma   | M      | 71  | sigmoid      | pT2 pN0 | G2      | 15 mm     | tubulovillous  |
